# Supplementary material
Source: MDPI journal article supplement (https://www.mdpi.com/2076-3417/10/14/4751)
Supplement: s1 [file s1]

# Supplementary Materials: Comparing Semantic Differential Methods in Affective Engineering Processes: A Case Study on Vehicle Instrument Panels

Gee Won Shin, Sunghwan Park, Yong Min Kim, Yushin Lee and Myung Hwan Yun

## <Absolute Evaluation 1>

Sample No. 2

- Please rate the visual or tactile feeling from leather samples in terms of given semantic pairs.
  - Please, use appropriate interaction methods.
- ※ Perform at least one interaction per semantic pair.

|          | -3                                                                                                                                                              | -2                   | -1                   | 0                    | +1                   | +2                   | +3                   |         |
|----------|-----------------------------------------------------------------------------------------------------------------------------------------------------------------|----------------------|----------------------|----------------------|----------------------|----------------------|----------------------|---------|
|          | <div style="display: flex; align-items: center; justify-content: space-between;"> <span>Extremely ←</span> <span>Neither</span> <span>→ Extremely</span> </div> |                      |                      |                      |                      |                      |                      |         |
| Dark     | <input type="text"/>                                                                                                                                            | <input type="text"/> | <input type="text"/> | <input type="text"/> | <input type="text"/> | <input type="text"/> | <input type="text"/> | Bright  |
| Matt     | <input type="text"/>                                                                                                                                            | <input type="text"/> | <input type="text"/> | <input type="text"/> | <input type="text"/> | <input type="text"/> | <input type="text"/> | Glossy  |
| Cooling  | <input type="text"/>                                                                                                                                            | <input type="text"/> | <input type="text"/> | <input type="text"/> | <input type="text"/> | <input type="text"/> | <input type="text"/> | Warming |
| Dry      | <input type="text"/>                                                                                                                                            | <input type="text"/> | <input type="text"/> | <input type="text"/> | <input type="text"/> | <input type="text"/> | <input type="text"/> | Moist   |
| Slippery | <input type="text"/>                                                                                                                                            | <input type="text"/> | <input type="text"/> | <input type="text"/> | <input type="text"/> | <input type="text"/> | <input type="text"/> | Sticky  |
| Flat     | <input type="text"/>                                                                                                                                            | <input type="text"/> | <input type="text"/> | <input type="text"/> | <input type="text"/> | <input type="text"/> | <input type="text"/> | Rugged  |
| Hard     | <input type="text"/>                                                                                                                                            | <input type="text"/> | <input type="text"/> | <input type="text"/> | <input type="text"/> | <input type="text"/> | <input type="text"/> | Soft    |

**Figure S1.** An Example of evaluation questionnaire administered in Absolute Evaluation 1.

## &lt;Absolute Evaluation 2&gt;

5 – 4 – 1 – 2 – 6 – 3

- Please rate the visual or tactile feeling from leather samples in terms of given semantic pairs.
- Please, use appropriate interaction methods.
- ※ Perform at least one interaction per semantic pair.
- Please, fill out the correct location for each sample.

|          | Dark                                        | -3                   | -2                   | -1                   | 0                    | +1                   | +2                   | +3                   | Bright |
|----------|---------------------------------------------|----------------------|----------------------|----------------------|----------------------|----------------------|----------------------|----------------------|--------|
|          | Extremely ← ————— Neither ————— → Extremely |                      |                      |                      |                      |                      |                      |                      |        |
| Sample 1 | <input type="text"/>                        | <input type="text"/> | <input type="text"/> | <input type="text"/> | <input type="text"/> | <input type="text"/> | <input type="text"/> | <input type="text"/> |        |
| Sample 2 | <input type="text"/>                        | <input type="text"/> | <input type="text"/> | <input type="text"/> | <input type="text"/> | <input type="text"/> | <input type="text"/> | <input type="text"/> |        |
| Sample 3 | <input type="text"/>                        | <input type="text"/> | <input type="text"/> | <input type="text"/> | <input type="text"/> | <input type="text"/> | <input type="text"/> | <input type="text"/> |        |
| Sample 4 | <input type="text"/>                        | <input type="text"/> | <input type="text"/> | <input type="text"/> | <input type="text"/> | <input type="text"/> | <input type="text"/> | <input type="text"/> |        |
| Sample 5 | <input type="text"/>                        | <input type="text"/> | <input type="text"/> | <input type="text"/> | <input type="text"/> | <input type="text"/> | <input type="text"/> | <input type="text"/> |        |
| Sample 6 | <input type="text"/>                        | <input type="text"/> | <input type="text"/> | <input type="text"/> | <input type="text"/> | <input type="text"/> | <input type="text"/> | <input type="text"/> |        |

**Figure S2.** An Example of evaluation questionnaire administered in Absolute Evaluation 2.

**<Relative Evaluation>**

Reference Sample No. 1  
Evaluation Sample No. 4

- Please rate the visual or tactile feeling from leather samples in terms of given semantic pairs.
- Please, use appropriate interaction methods.
- ※ Perform at least one interaction per semantic pair.
- Please, evaluate a given sample comparing to a reference sample.

**Evaluation sample is more**

-3    -2    -1    0    +1    +2    +3

Extremely ←                  Neither                  → Extremely

|          |  |  |  |  |  |  |  |         |
|----------|--|--|--|--|--|--|--|---------|
| Dark     |  |  |  |  |  |  |  | Bright  |
| Matt     |  |  |  |  |  |  |  | Glossy  |
| Cooling  |  |  |  |  |  |  |  | Warming |
| Dry      |  |  |  |  |  |  |  | Moist   |
| Slippery |  |  |  |  |  |  |  | Sticky  |
| Flat     |  |  |  |  |  |  |  | Rugged  |
| Hard     |  |  |  |  |  |  |  | Soft    |

**Figure S3.** An Example of evaluation questionnaire administered in Relative Evaluation.

### <Perceived Distinguishability>

Please check how difficult it was to feel the difference among samples  
for the semantic pair in the Absolute Evaluation 1

| Evaluated Semantic Pairs | Distinguishability in Samples |           |                  |         |             |      |           |
|--------------------------|-------------------------------|-----------|------------------|---------|-------------|------|-----------|
|                          | Very difficult                | Difficult | Little difficult | Neither | Little easy | Easy | Very easy |
| Dark – Bright            | ①                             | ②         | ③                | ④       | ⑤           | ⑥    | ⑦         |
| Matt – Glossy            | ①                             | ②         | ③                | ④       | ⑤           | ⑥    | ⑦         |
| Cooling – Warming        | ①                             | ②         | ③                | ④       | ⑤           | ⑥    | ⑦         |
| Dry – Moist              | ①                             | ②         | ③                | ④       | ⑤           | ⑥    | ⑦         |
| Slippery – Sticky        | ①                             | ②         | ③                | ④       | ⑤           | ⑥    | ⑦         |
| Flat – Rugged            | ①                             | ②         | ③                | ④       | ⑤           | ⑥    | ⑦         |
| Hard – Soft              | ①                             | ②         | ③                | ④       | ⑤           | ⑥    | ⑦         |

**Figure S4.** An Example of evaluation questionnaire administered in Perceived Distinguishability.
